# Supplementary material for: Inheritance and Molecular Characterization of a Novel Mutated AHAS Gene Responsible for the Resistance of AHAS-Inhibiting Herbicides in Rapeseed (Brassica napus L.)
Source: MDPI journal article supplement (doi:10.3390/ijms21041345), 2020-02-17
Supplement: s1 [file s1]

**Tribenuron-methyl (g a.i. ha<sup>-1</sup>)**

**Bensufuron-methyl (g a.i. ha<sup>-1</sup>)**

**Monosulfuron-ester sodium (g a.i. ha<sup>-1</sup>)**

*ZS9*

*K5*

*ZS9*

*K5*

*ZS9*

*K5*

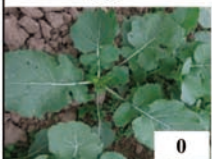

0

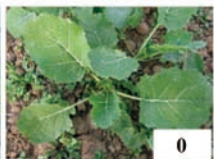

0

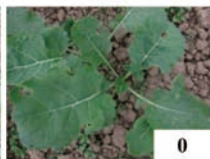

0

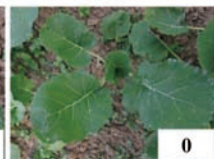

0

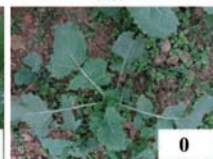

0

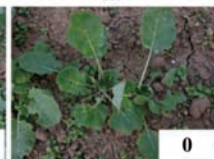

0

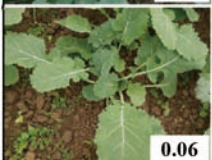

0.06

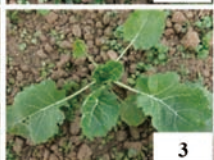

3

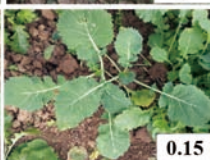

0.15

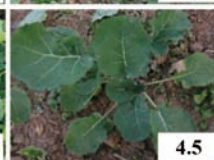

4.5

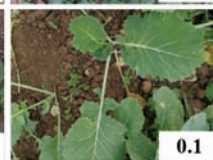

0.1

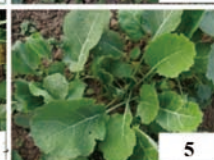

5

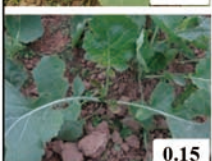

0.15

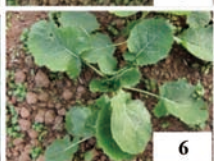

6

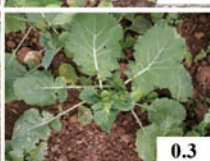

0.3

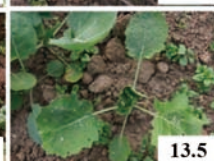

13.5

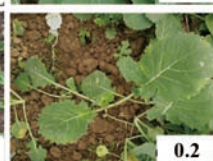

0.2

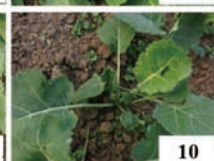

10

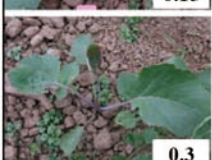

0.3

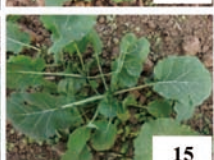

15

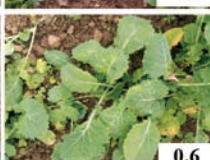

0.6

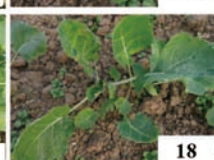

18

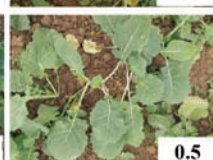

0.5

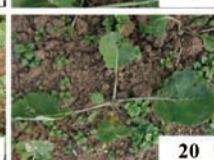

20

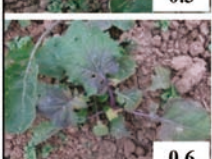

0.6

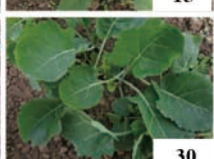

30

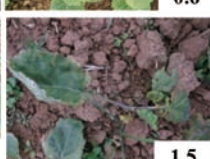

1.5

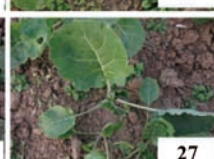

27

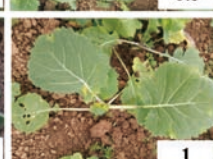

1

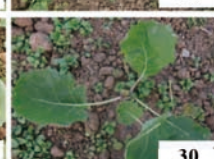

30

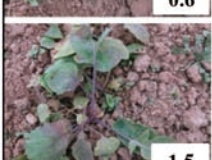

1.5

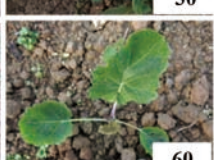

60

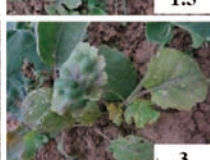

3

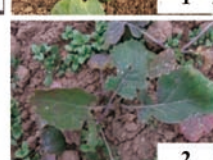

2

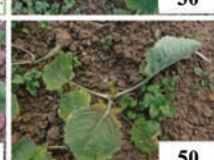

50

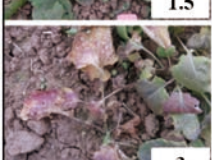

3

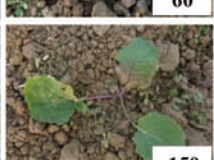

150

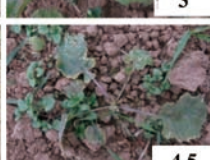

4.5

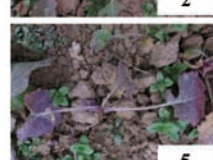

5

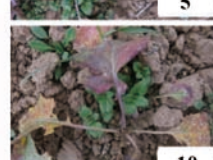

10
