# Supplementary figures and images for: Inheritance and Molecular Characterization of a Novel Mutated AHAS Gene Responsible for the Resistance of AHAS-Inhibiting Herbicides in Rapeseed (Brassica napus L.)
Source: MDPI journal article supplement (doi:10.3390/ijms21041345), 2020-02-17

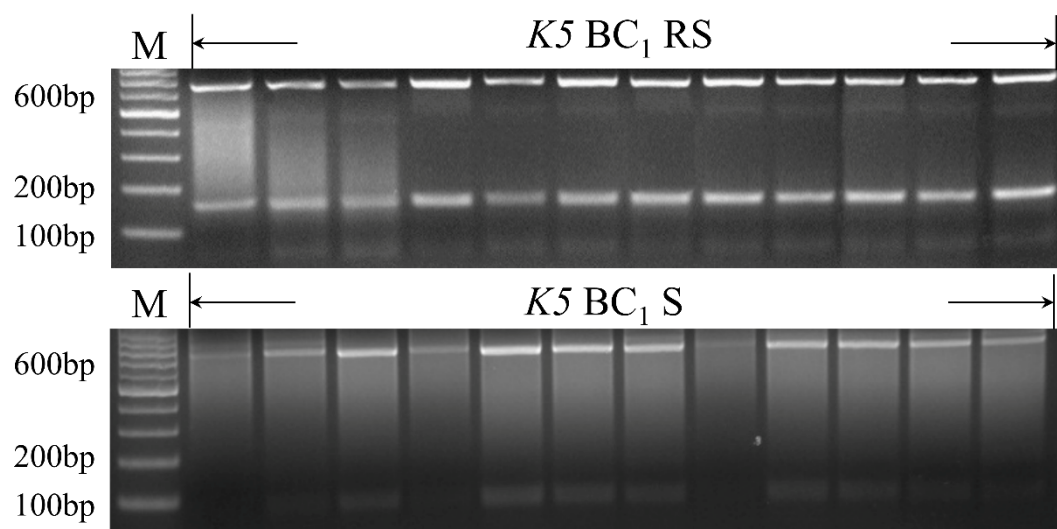

Supplement: s1 [file s1]

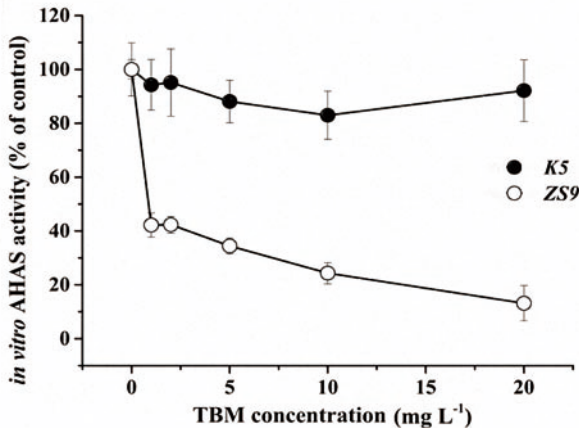

Supplement: s1 [file s1]

TBM 0.15 g a.i. ha<sup>-1</sup>

ZS9

K5 BC<sub>1</sub>

K5 F<sub>1</sub>

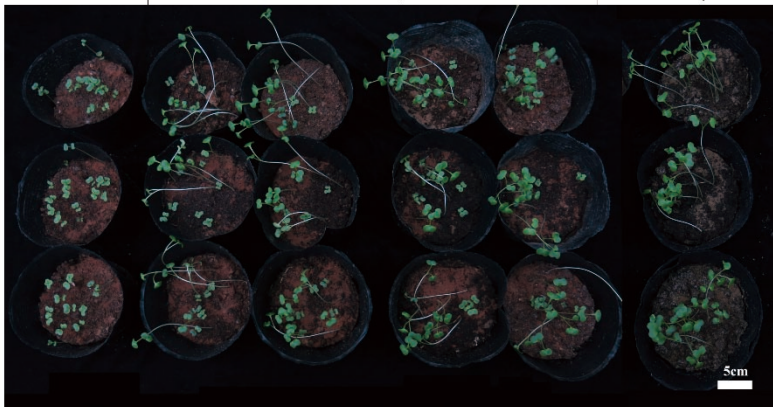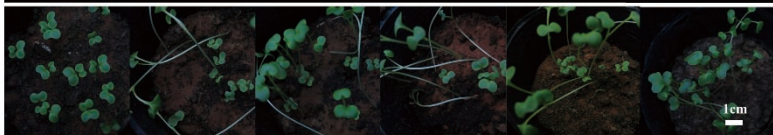

Supplement: s1 [file s1]
